# Supplementary material for: Relationship between People’s Interest in Medication Adherence, Health Literacy, and Self-Care: An Infodemiological Analysis in the Pre- and Post-COVID-19 Era
Source: MDPI journal article supplement (doi:10.3390/jpm13071090), 2023-07-01
Supplement: s1 [file s1]

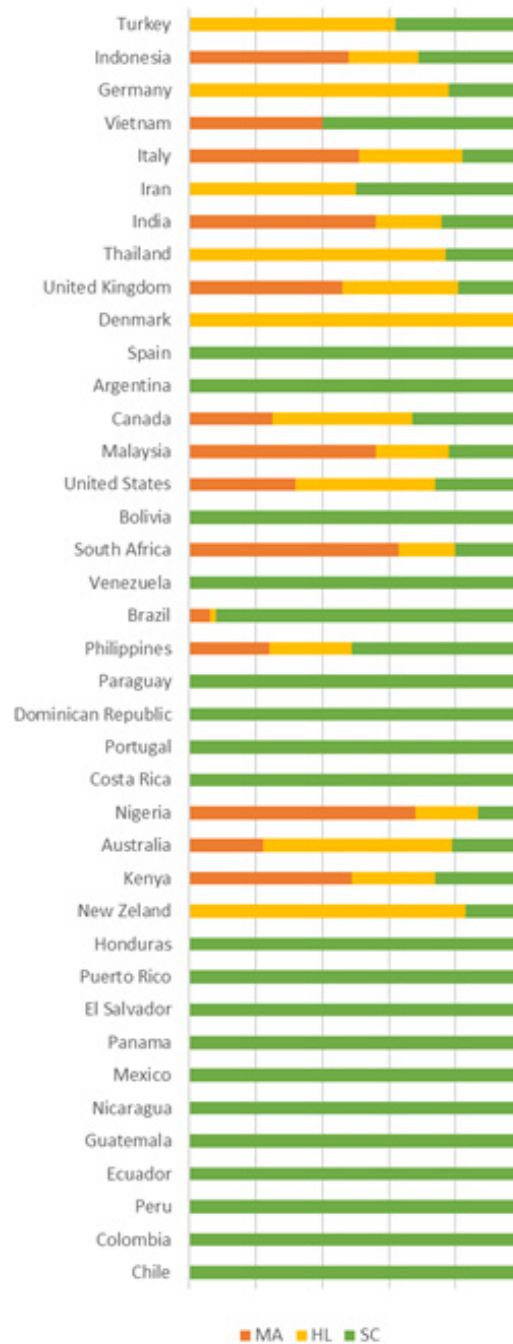

**Supplementary Figure 1. Comparison of RSVs between different countries**

Abbreviations: HL, health literacy; MA, medication adherence; SC, self-care
